# A population phylogenetic view of mitochondrial heteroplasmy

Peter R. Wilton<sup>a,\*</sup>, Arslan Zaidi<sup>b</sup>, Kateryna Makova<sup>b</sup>, Rasmus Nielsen<sup>a,c</sup>

<sup>a</sup>*Department of Integrative Biology, University of California, Berkeley, Berkeley, CA, 94720, USA*

<sup>b</sup>*Department of Biology, Penn State University, University Park, PA 16802, USA*

<sup>c</sup>*Department of Statistics, University of California, Berkeley, Berkeley, CA, 94720, USA*

---

## Abstract

The mitochondrion has recently emerged as an active player in a myriad of cellular processes. Additionally, it was recently shown that more than 200 diseases are known to be linked to variants in mitochondrial DNA or in nuclear genes interacting with mitochondria. This has reinvigorated interest in its biology and population genetics. Mitochondrial heteroplasmy, or genotypic variation of mitochondria within an individual, is now understood to be common in humans and important in human health. However, it is still not possible to make quantitative predictions about the inheritance of heteroplasmy and its proliferation within the body, partly due to the lack of an appropriate model. Here, we present a population-genetic framework for modeling mitochondrial heteroplasmy as a process that occurs on an ontogenetic phylogeny, with genetic drift and mutation changing heteroplasmy frequencies during the various developmental processes represented in the phylogeny. Using this framework, we develop a Bayesian inference method for inferring rates of mitochondrial genetic drift and mutation at different stages of human life. Applying the method to previously published heteroplasmy frequency data, we demonstrate a severe effective germline bottleneck comprised of the cumulative genetic drift occurring between the divergence of germline and somatic cells in the mother and the separation of germ layers in the offspring. Additionally, we find that the two somatic tissues we analyze here undergo tissue-specific bottlenecks during embryogenesis, less severe than the effective germline bottleneck, and that these somatic tissues experience little additional genetic drift during adulthood. We conclude with a discussion of possible extensions of the ontogenetic phylogeny framework and its possible applications to other ontogenetic processes in addition to mitochondrial heteroplasmy.

*Keywords:* somatic evolution, cell lineage, development, phylogeny

---

## 1. Introduction

As the energy providers of the cell, mitochondria play a vital role in the biology of eukaryotes. Much of the metabolic functionality of the mitochondrion is encoded in the mitochondrial genome, which in humans is 16,569 bp in length and inherited from the mother. While it was long thought that the mitochondria within the human body are genetic clones, it is now recognized that variation of mitochondrial DNA (mtDNA) is common within human cells and tissues. This variation, termed mitochondrial heteroplasmy, is a normal part of healthy human biology (REBOLLEDO-JARAMILLO *et al.*, 2014; LI *et al.*, 2016, 2010), but it is also important in human health and disease, being the primary mode of inheritance of mitochondrial disease and playing a role in cancer and aging (reviewed in STEWART and CHINNERY, 2015; WALLACE and CHALKIA, 2013).

Because of its importance in human health, it is crucial to understand how mitochondrial heteroplasmy is transmitted between generations and becomes distributed within an individual. Heteroplasmy frequencies can change drastically between mother and offspring, owing to a hypothesized bottleneck in the number of

---

\*Corresponding author

*Email address:* [pwilton@berkeley.edu](mailto:pwilton@berkeley.edu) (Peter R. Wilton)

segregating units of mitochondrial genomes during early oogenesis (CREE *et al.*, 2008). We note that there is currently no consensus regarding the extent to which the effects of this bottleneck are caused by an actual decrease in the number of mitochondrial genome copies versus co-segregation of genetically homogeneous groups of mitochondrial DNA (CAO *et al.*, 2007; CREE *et al.*, 2008; CARLING *et al.*, 2011).

Nevertheless, in order to better predict the change in heteroplasmy frequencies between generations, previous studies have sought to infer the size of the oogenic bottleneck, either through direct observation (in mice) of the number of mitochondrial DNA genome copies (CREE *et al.*, 2008; CAO *et al.*, 2007), or through indirect measurement, making statistical conclusions about the bottleneck size based on observed frequency changes between generations (JOHNSTON *et al.*, 2015; REBOLLEDO-JARAMILLO *et al.*, 2014; MILLAR *et al.*, 2008; HENDY *et al.*, 2009; LI *et al.*, 2016). In mice, estimates of the bottleneck size have ranged from 200 to more than 1000 (CREE *et al.*, 2008; CAO *et al.*, 2007; JOHNSTON *et al.*, 2015), and in a recent re-analysis of previous data, it was claimed that the minimal bottleneck size may have only small effects on heteroplasmy transmission dynamics, depending on the details of how oogonia proliferate (JOHNSTON *et al.*, 2015). In humans, indirect estimates of the bottleneck size have ranged from 1 to 200, depending on the dataset and the statistical methods used to estimate the bottleneck size (MARCHINGTON *et al.*, 1997; GUO *et al.*, 2013).

Surveys of heteroplasmy occurrence in humans have also found that heteroplasmies are often more numerous and at greater frequency in older individuals, and that older mothers transmit more heteroplasmies to their offspring (SONDHEIMER *et al.*, 2011; REBOLLEDO-JARAMILLO *et al.*, 2014; LI *et al.*, 2015). It has also been observed that heteroplasmy frequencies vary from one tissue to another within an individual (REBOLLEDO-JARAMILLO *et al.*, 2014; LI *et al.*, 2015). These observations underscore the fact that heteroplasmy frequencies change not only during oogenesis in the mother, but also during embryogenesis and throughout adult life. Ideally any indirect statistical inferences made about the bottleneck size or other aspects of heteroplasmy frequency dynamics would account for all sources of heteroplasmy frequency change simultaneously; such an approach would make maximal use of the information contained in observed heteroplasmy frequencies.

Maternal inheritance and the presence of multiple copies of mtDNA per cell does not allow one to apply existing population genetics models to mitochondrial data directly and calls for the development of novel methodology. Here, we describe a model of heteroplasmy dynamics throughout several key stages of human growth and reproduction. Our approach is to model heteroplasmy frequency change as a population-genetic process of genetic drift and mutation that occurs along the branches of an ontogenetic phylogeny describing the developmental relationships amongst sampled tissues in related individuals. Our model is similar to typical population-phylogenetic inference models (e.g., PICKRELL and PRITCHARD, 2012; GAUTIER and VITALIS, 2013), except that it also includes features specific to ontogenetic phylogenies. We employ our model in a Bayesian inference procedure that uses Markov chain Monte Carlo (MCMC) to sample from posterior distributions of genetic drift and mutation rate parameters for various developmental processes. After demonstrating the accuracy of our method with simulated data, we apply it to real heteroplasmy frequency data and present new insights into the dynamics of heteroplasmy frequency change in humans.

## 2. Methods

### 2.1. Ontogenetic phylogenies

We model the mitochondria in tissues sampled from one or more related individuals as a group of populations related by an ontogenetic phylogeny. Along each branch of the ontogenetic phylogeny, heteroplasmy frequencies within some ancestral tissue change due to the action of genetic drift and mutation. We assume that the shape of the ontogenetic phylogeny is given.

Our ontogenetic phylogeny model differs in a few important ways from the typical population phylogenetic likelihood framework. Firstly, we allow a single set of parameters to determine the dynamics on multiple parts of the phylogeny, representing developmental processes that exert the same population-genetic forces in different individuals in the family pedigree. Secondly, we allow genetic drift and mutation to accumulate at a rate per year along certain branches of the ontogenetic phylogeny, rather than requiring that everyone experience the same effects of genetic drift and mutation regardless of age. This is motivated by previous

observations that heteroplasms segregate and accumulate with time within somatic tissues (LI *et al.*, 2015; SONDHEIMER *et al.*, 2011; REBOLLEDO-JARAMILLO *et al.*, 2014) and within the germline (REBOLLEDO-JARAMILLO *et al.*, 2014; LI *et al.*, 2016; WACHSMUTH *et al.*, 2016). Additionally, we allow single branches in the ontogenetic phylogeny to be parameterized by multiple distinct periods of genetic drift and mutation, so that inferences can be made about the effects of multiple ontogenetic processes that affect heteroplasmy frequencies along the same branch of the phylogeny. Figure 1 demonstrates these features with an ontogenetic phylogeny representing the relationships between two tissues sampled in both a mother and her offspring.

Each ontogenetic process in the phylogeny is parameterized by a genetic drift parameter and a mutation rate. The mutation rate is  $\theta = 2N_e\mu$ , where  $N_e$  is the effective size of the relevant cell population and  $\mu$  is the per-replication, per-base mutation rate. Genetic drift can be modeled in one of three ways. Firstly, genetic drift may be specified by an amount of genetic drift  $t = g/N_e$ , where  $g$  is the number of generations in a Wright-Fisher model of a population with (large) haploid effective size  $N_e$ . Secondly, genetic drift may be modeled by a single-generation bottleneck to population size  $N_b$ , with binomial sampling of mitochondrial genomes, followed by doubling of the population back up to a large size according to the rules of the Wright-Fisher model of reproduction within an expanding population. Thirdly, genetic drift can be modeled as accumulating with time at a rate  $\lambda$  per year, in which case after  $a$  years, the genetic drift that has accumulated is equivalent to  $\lambda a N_e$  generations in a Wright-Fisher model with effective population size  $N_e$ .

## 2.2. Likelihood calculation

Given ontogenetic tree  $\mathcal{T}$  with  $k$  ontogenetic processes, genetic drift parameters  $\mathbf{b} = \{b_1, \dots, b_k\}$  and mutation rates  $\boldsymbol{\theta} = \{\theta_1, \dots, \theta_k\}$ , our likelihood is

$$L_{\mathcal{T}}(\mathbf{b}, \boldsymbol{\theta} \mid \mathcal{D}) = P_{\mathcal{T}}(\mathcal{D} \mid \mathbf{b}, \boldsymbol{\theta}), \quad (1)$$

where  $\mathcal{D}$  represents the heteroplasmy frequency data. (Below, the  $\mathcal{T}$  subscript is left off for brevity.) Suppose heteroplasmy frequencies were sampled from  $F$  families. Writing  $D_{ij}$  for the heteroplasmy frequency data at the  $j$ th heteroplasmic locus in family  $i$ ,  $C_i$  for the number of heteroplasmic sites in family  $i$ , and  $H_i$  for the event that a site is heteroplasmic in family  $i$ , our likelihood can be written

$$L(\mathbf{b}, \boldsymbol{\theta} \mid \mathcal{D}) = P(\mathcal{D}; \mathbf{b}, \boldsymbol{\theta}) = \prod_{i=1}^F P(C_i; \mathbf{b}, \boldsymbol{\theta})^{\frac{1}{\alpha}} \prod_{j=1}^{C_i} P(D_{ij} \mid H_i; \mathbf{b}, \boldsymbol{\theta}), \quad (2)$$

where  $P(C_i; \mathbf{b}, \boldsymbol{\theta})$  is the probability of  $C_i$  heteroplasms occurring in family  $i$  and  $P(D_{ij} \mid H_i; \mathbf{b}, \boldsymbol{\theta})$  is the probability of the observed heteroplasmy data at the  $j$ th heteroplasmic locus in family  $i$ , conditional on heteroplasmy (i.e., polymorphism) in at least one tissue. We assume that  $C_i$  is Poisson distributed with rate  $G \cdot P(H_i; \mathbf{b}, \boldsymbol{\theta})$ , where  $G$  is the genome size and  $P(H_i; \mathbf{b}, \boldsymbol{\theta})$  is the probability that a single site is heteroplasmic in family  $i$ .

We penalize the part of the likelihood involving the number of heteroplasms with the parameter  $\alpha$  in order to make inference less sensitive to identification of heteroplasms, which is a non-trivial problem, especially for low-frequency heteroplasms (LI and STONEKING, 2012; REBOLLEDO-JARAMILLO *et al.*, 2014). Without such a penalty, the likelihood is too strongly influenced by the number of observed heteroplasms, a quantity influenced both by false positives—at a rate of up to  $\sim 10\%$  for low-frequency heteroplasms in REBOLLEDO-JARAMILLO *et al.* (2014)—and by false negatives caused by conservative minimum allele frequencies thresholds (1% in REBOLLEDO-JARAMILLO *et al.*, 2014). On the other hand, if the number of heteroplasms is completely absent from the likelihood, such that all information about drift and mutation is taken only from the heteroplasmy frequencies, posterior distributions of mutation rates are sensitive to outlier allele frequencies that do not fit a model of genetic drift and (infrequent) mutation as well. As a compromise, we set the value of this likelihood penalty to  $\alpha = 100$ , which in effect artificially reduces the total number of sites considered in this component of the likelihood, such that if in reality 500 heteroplasms are observed out of a total of 100,000 sites, the contribution to the likelihood would be the same as if 5 heteroplasms were observed in a total of 1000 sites.

With our likelihood (2) we implicitly ignore linkage between heteroplasmic sites within a family even though in reality the lack of recombination means that the sites are perfectly linked. We justify this approximation in two ways: first, there are usually few heteroplasmies co-segregating in a family (mean 2.6 in REBOLLEDO-JARAMILLO *et al.* 2014, 1.0 in LI *et al.* 2016), and second, amongst heteroplasmies co-segregating in a family, most segregate at low frequency, so that changes in the frequency of one heteroplasmy do not greatly affect the frequency of another. Thus the dynamics at several heteroplasmic sites should closely resemble those of a model in which each site truly segregates independently. This assumption is supported by simulations of nonrecombining mitochondrial genomes (see Section 2.4 below). We further assume that heteroplasmy frequencies are independent between families.

A site is determined to be heteroplasmic according to the filtering steps described in REBOLLEDO-JARAMILLO *et al.* (2014), which include filters for mapping quality, base quality, minimum allele frequency (1%), coverage ( $> 1000\times$ ), local sequence complexity, and contamination. Rather than calculate likelihoods based on called allele frequencies, we model binomial sampling error in the number of consensus and alternative reads sampled from a true, unknown allele frequency. Thus  $D_{ij}$  represents the number of consensus and alternative alleles at the  $j$ th heteroplasmic locus in family  $i$ . Conditional on heteroplasmy, the probability of the observed read counts  $D_{ij}$  at locus  $j$  in family  $i$  is

$$P(D_{ij} | H_i; \mathbf{b}, \boldsymbol{\theta}) = \frac{\sum_{x_{ij}} P(D_{ij} | x_{ij}) P(x_{ij}; \mathbf{b}, \boldsymbol{\theta})}{P(H_i; \mathbf{b}, \boldsymbol{\theta})}, \quad (3)$$

where  $x_{ij}$  is the true, unknown allele frequency at locus  $j$  in family  $i$ . The sum is performed over all possible allele frequencies in the sampled tissues. Both the numerator and the denominator can be calculated using FELSENSTEIN's (1981) pruning algorithm, a dynamic programming algorithm frequently used in likelihood calculations for phylogenetic trees. Details of how we calculated these quantities are given in Appendix A.

The pruning algorithm requires distributions of allele frequency transitions along a branch. Our approach to calculating allele frequency transition probabilities is simple and intuitive: we precalculate transition distributions under the discrete-generation Wright-Fisher model using numerical matrix multiplication on a grid of generations and mutation rates. To obtain a transition distribution that was not precomputed, we linearly interpolate between precomputed distributions. Using a haploid population size of  $N = 1000$  in our Wright-Fisher model calculations, we obtain a satisfactory approximation to numerically exact Wright-Fisher transition probabilities by precomputing distributions at just 68 different generations, ranging from 1 to 10,000, and 28 mutation rates, with  $\theta = 2N_e\mu$  ranging from  $10^{-12}$  to 50. For ontogenetic processes modeled by a single-generation bottleneck with subsequent expansion, we precompute allele-frequency transition distributions for 48 bottleneck sizes ranging from 2 to 500, linearly interpolating between bottleneck sizes for distributions that are not precomputed.

Rather than use each  $(1001 \times 1001)$  transition matrix in its entirety, we combine discrete allele frequencies into 115 bins, with bins unevenly distributed between 0 and 1 such that low and high frequencies are more represented than intermediate frequencies. We bin allele frequencies according to the following scheme: Let  $P = \{P_{i,j}\}$  be a  $(1001 \times 1001)$  allele frequency transition matrix for a Wright-Fisher model with  $N = 1000$ , with  $P_{i,j}$  being the probability of transitioning from frequency  $i$  to  $j$ . Let  $Q = \{Q_{k,l}\}$  be a  $(115 \times 115)$  binned transition matrix. If  $(a_1, \dots, a_m)$  are frequencies in bin  $k$ , and  $(b_1, \dots, b_n)$  are frequencies associated in bin  $l$ , then

$$Q_{k,l} = \begin{cases} \sum_{x=1}^n P_{(m+1)/2, b_x} & m \text{ odd} \\ \sum_{x=1}^n (\frac{1}{2}P_{m/2, b_x} + \frac{1}{2}P_{m/2+1, b_x}) & m \text{ even.} \end{cases}$$

The pruning algorithm also requires a distribution of allele frequencies at the root of the phylogeny. Following TATARU *et al.* (2015), we use a discretized, symmetric beta distribution with additional, symmetric probability weights at frequencies 0 and 1. The two parameters specifying this distribution are inferred jointly with genetic drift and mutation parameters.

### 2.3. Inference

We take a Bayesian approach to inference. Prior distributions are  $\text{Uniform}(10^{-6}, 3)$  for genetic drift parameters, measured in generations per  $N_e$  (henceforth “drift units”); the lower limit of this drift prior distribution is set to be greater than zero in order to improve MCMC convergence. For genetic drift parameters specified by a rate of accumulation of drift units per year, the lower (resp. upper) limit of the (Uniform) prior distribution limits are divided by the minimum (resp. maximum) of the ages by which the rate is multiplied. We did not allow the effects of genetic drift to decrease with age. Prior distributions on bottleneck sizes are  $\text{Uniform}(2, 500)$ , and for mutation rate parameters  $\theta = 2N_e\mu$ , the prior distribution is  $\text{Log-Uniform}(10^{-8}, 10^{-1})$ .

We employ an affine-invariant ensemble Markov Chain Monte Carlo (MCMC) procedure (GOODMAN and WEARE, 2010) to sample from posterior distributions, as implemented in the Python package `emcee` (FOREMAN-MACKEY *et al.*, 2013). We assess convergence by visual inspection of the posterior traces. Running 500 chains in the ensemble MCMC for 20000 iterations each, we find good convergence after  $\sim 2500$  iterations and thus discard the first 5000 iterations of each chain as burn-in. With  $\sim 100$  heteroplasmic loci, a run takes 60–80 CPU hours, but due to the parallel nature of ensemble MCMC, calculations can be spread across CPUs, so that on a twenty-core compute node, results are obtained in approximately four hours. Reported 95% credible intervals are intervals of the highest posterior density.

As a way of evaluating the relative support for different ontogenetic models, we estimate Bayes factors (i.e., ratios of posterior evidence integrals) for alternative ontogenetic models of the accumulation of drift within cell lineages. For models  $M_1$  and  $M_2$ , the Bayes factor is

$$BF(M_1, M_2) = \frac{\int p(\theta)L(\theta | \mathcal{D}, M_1)d\theta}{\int p(\theta)L(\theta | \mathcal{D}, M_2)d\theta}, \quad (4)$$

where  $p(\cdot)$  is the prior distribution and  $L(\cdot | \mathcal{D}, M_k)$  is the likelihood under model  $k$ . These posterior evidence integrals are approximated using `emcee`'s (FOREMAN-MACKEY *et al.*, 2013) implementation of an approach using thermodynamic integration (see GOGGANS and CHI, 2004).

### 2.4. Simulation

We performed two sets of simulation to test our inference procedure. The first simulations were performed under the model assumed by our inference procedure. As described above, this model assumes that each locus segregates independently, allele frequency transitions occur according to the Wright-Fisher model of genetic drift and bi-allelic mutation, and heteroplasmy frequencies in the root of the ontogenetic phylogeny are controlled by the two parameters of a discretized, symmetric beta distribution with extra probability weight at frequencies zero and one. These simulations were performed forward in time using a custom Python script.

The second set of simulations tested how our assumption that loci segregate independently affects inference when the data are simulated from nonrecombining genomes sampled from many different families. These simulations were performed using a custom interface to the simulation package `msprime` (KELLEHER *et al.*, 2016), which simulates genetic variation under the standard neutral coalescent model with infinite-sites mutation. In these simulations, population sizes and branch lengths are equivalent to those under the forward-time simulations, but at the root of the ontogenetic phylogeny, we assume that ancestral lineages trace their ancestry back in time in a single panmictic population of constant size. Simulations were performed under conditions in which the distribution of the number of heteroplasmies per family roughly matched the distribution observed in the data.

### 2.5. Data

We applied our inference procedure to a publicly available dataset, containing heteroplasmy allele frequencies for 98 mtDNA heteroplasmies from 39 mother-offspring duos, originally published by REBOLLEDO-JARAMILLO *et al.* (2014). In this dataset, mitochondria from blood and cheek epithelial cells were sampled from both mother and offspring, resulting in a ontogenetic phylogeny with four leaves, each representing one

of the four tissues sampled from a mother-offspring duo. Details of heteroplasmy discovery are described in REBOLLEDO-JARAMILLO *et al.* (2014).

To model the segregation of heteroplasmy frequencies during the ontogeny of the four tissues sampled from each duo, we used the ontogenetic phylogeny shown in Figure 1. This ontogenetic phylogeny models several life stages. The root of the phylogeny occurs at the divergence of the mother’s somatic and germline tissues when she is an embryo. On the branch leading to the somatic tissues in the mother, there is a brief period of early embryonic development before the blood and cheek epithelial cell lineages diverge at gastrulation as members of the ectodermal (cheek epithelial) and mesodermal (blood) germ layers. After diverging at gastrulation, each somatic tissue undergoes independent periods of genetic drift and mutation during later embryogenesis and early growth, and finally for each tissue there are independent rates of accumulation of genetic drift and mutation throughout adult life.

On the branch leading to the offspring tissues in the ontogenetic phylogeny in Figure 1 the first stage represented is the period of oogenesis prior to the birth of the mother, when the oogenic bottleneck is thought to occur. This is followed by the oocyte stage, during which we assume the mitochondria accumulate genetic drift and mutation at some rate linearly with the age of the mother before childbirth. At fertilization, this branch undergoes the same period of early somatic development experienced by the mother’s somatic tissues prior to gastrulation. Finally, the two somatic tissues of the offspring diverge at gastrulation and go through the same stages of development as the somatic tissues of the mother.

## 2.6. Effective oogenic bottleneck

Analyzing both simulated and real data, we find that there is limited power to infer the size of the oogenic bottleneck. This is to be expected, given that we also model the subsequent genetic drift of the later stages of oocyte development and in the early developing embryo; each of these three ontogenetic processes occurs along the same branch of the ontogenetic phylogeny (Fig. 1), which causes their respective contributions of genetic drift to be conflated with one another. We note that the genetic drift parameters of these ontogenetic processes are not truly unidentifiable: power to distinguish genetic drift during the early-oogenesis bottleneck from that of the later maternal germline is provided by the differing effects of genetic drift in mothers of different ages, and power to distinguish the contribution of drift in the early embryo is provided by the fact that this process occurs in both the mother and the offspring. Differences in effective population size (and thus scaled mutation rates) also provide theoretical power to distinguish these parameters, but nevertheless we find that these genetic drift parameters tend to become conflated with one another.

As a way of counteracting this conflation, we combine the genetic drift parameters of this branch in the ontogenetic phylogeny into an effective bottleneck size (EBS), summarizing the total genetic drift between mother and offspring. The effective bottleneck is comprised of the oogenic bottleneck *per se*, the accumulation of genetic drift in the oocyte prior to ovulation, and the genetic drift in the embryo between fertilization and gastrulation. To combine genetic drift parameterized as a bottleneck with genetic drift parameterized in drift units, we used the approximate relationship  $N_b \approx 2/d$ , where  $d$  is genetic drift in drift units, and  $N_b$  is the bottleneck size. This approximation is justified in Appendix B. Using this relationship, our equation for the EBS has the form

$$N_{be} = \frac{2}{d + \lambda a}, \quad (5)$$

where  $d$  is the summed genetic drift from the oogenic bottleneck *per se* and pre-gastrulation embryogenesis,  $\lambda$  is the rate of genetic drift accumulation in the oocyte, and  $a$  is the age of the mother at childbirth. Because in our model genetic drift accumulates in the oocyte as the mother ages prior to ovulation, the size of the effective bottleneck decreases with age. We summarize this rate of decrease by linearizing (5) between ages 25 and 34, the first and third quartiles of maternal age at childbirth in the dataset from REBOLLEDO-JARAMILLO *et al.* (2014).

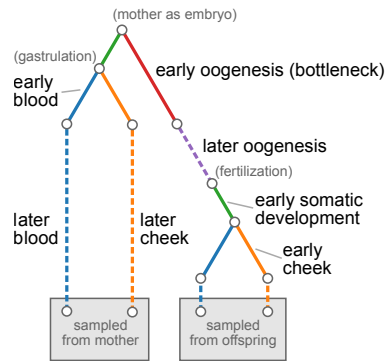

Figure 1: Ontogenetic phylogeny for sampled tissues in mother-child duos from REBOLLEDO-JARAMILLO *et al.* (2014). Each color represents a different tissue or developmental process. The leaves of the tree represent the blood and cheek epithelial tissues sampled from the mother and her child. Solid lines show processes modeled by a fixed amount of genetic drift and dashed lines show processes in which genetic drift accumulates linearly with age. The red component, representing early oogenesis, models a single-generation bottleneck with subsequent doubling of the population size back up to a large size. Parenthetical descriptions in gray show the timing of notable developmental events.

## 2.7. Availability

Our inference procedure is released under a permissive license in a Python package called `mope`, available at <https://github.com/ammodramus/mope> or from the Python Package Index (PyPI, <http://pypi.python.org/>). As we describe above, our inference procedure requires precomputed transition distributions. These can be generated by the user or downloaded from <https://github.com/ammodramus/mope>. Our simulation scripts are also provided with the inference procedure.

Data from REBOLLEDO-JARAMILLO *et al.* (2014) are available from that paper's supplementary material and from the NCBI Sequence Read Archive ([www.ncbi.nlm.nih.gov/sra](http://www.ncbi.nlm.nih.gov/sra)), accession SRP047378.

## 3. Results

### 3.1. Application to simulated data

The targets of our inference procedure are genetic drift parameters and population-size-scaled mutation rates for each ontogenetic process in the ontogenetic phylogeny. Genetic drift may be parameterized as a fixed amount of genetic drift (in drift units, i.e. generations /  $N_e$ ), as a rate of accumulation of drift per year, or as a haploid bottleneck size. The scaled mutation rates,  $\theta = 2N_e\mu$  are twice the product of the haploid effective population size  $N_e$  and the per-replication, per-base mutation rate  $\mu$ . Since  $\mu$  can be assumed to be the same in every mitochondrion, the mutation rates can also be interpreted as relative effective population sizes. Two parameters controlling the distribution of allele frequencies at the root of the phylogeny are also inferred.

The inference procedure performed well on data simulated under the model of drift and mutation assumed by the inference procedure. In a simulation of 500 independently segregating sites sampled from two tissues in each of 100 different mothers and their offspring, under parameters producing a total of 110 heteroplasmies, the branch lengths and mutation rates were inferred without apparent bias (Fig. 2), as were the two root distribution parameters (not shown). Posterior distributions were generally narrower for genetic drift parameters than for scaled mutation rates, and parameters of external branches were inferred more precisely than those of internal branches. Other parameter values produced similar results (Fig. S1).

The procedure also performed well on data generated in simulations that did not assume free recombination between heteroplasmic sites (Fig. S2). In these simulations, we simulated non-recombining mitochondrial genomes of 10,000 base pairs in 30 mother-offspring duos, under parameters resulting in 104 heteroplasmies. The  $\sim 3.7$  heteroplasmies per family in these simulations is similar to the  $\sim 2.6$  observed in the data from REBOLLEDO-JARAMILLO *et al.* (2014), supporting our assumption that linkage between heteroplasmies within families does not greatly affect inference results.

### genetic drift ( $\log_{10}$ )

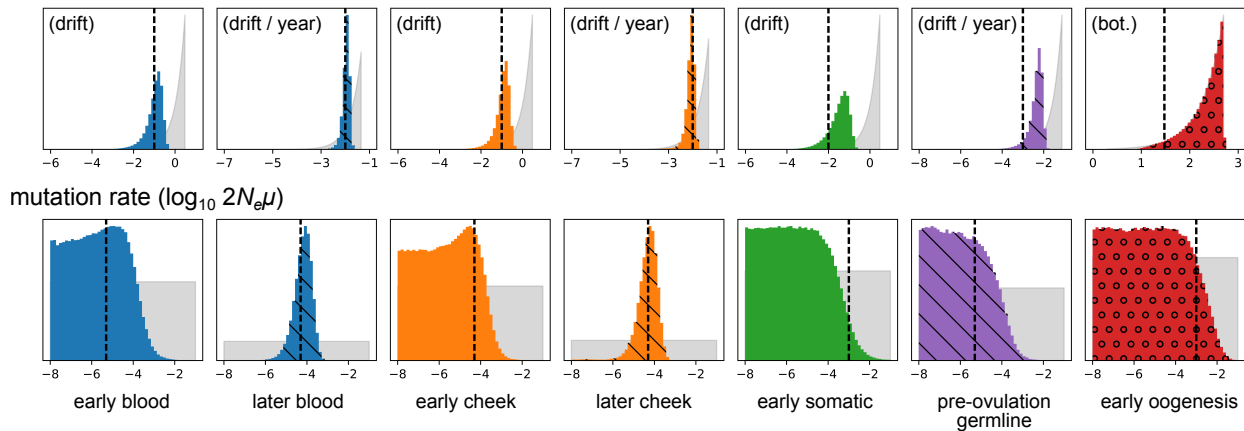

Figure 2: Posterior distributions of genetic drift and mutation parameters inferred from data simulated under the model assumed by the inference procedure. The top and bottom rows depict genetic drift and mutation rate parameters, respectively. Gray distributions depict prior distributions, and colored distributions depict posterior distributions. Colors match the colors of the ontogenetic processes in Figure 1. Distributions hashed with diagonal lines correspond to processes with drift parameterized by rates of accumulation of genetic drift with age. (That is, they correspond to the dashed lines in Fig. 1.) The circles in the red posterior distributions indicate that this process is modeled by an explicit bottleneck. All parameters are  $\log_{10}$ -transformed, and the distributions correspond to these transformed variables. Vertical dashed lines show the simulated parameter values. Not shown are the two parameters controlling the allele frequency distribution at the root of the phylogeny, which were inferred with comparable accuracy.

### 3.2. Application to real heteroplasmy data

In the application of our method to the heteroplasmy frequency data from REBOLLEDO-JARAMILLO *et al.* (2014) (Fig. 3), we find that the posterior distribution of the size of the early oogenesis bottleneck is broad, with a 95% credible interval (CI) spanning from 51.6 to 500.0. As we describe above (see 2.6), this is unsurprising given that in the assumed ontogenetic phylogeny there are three independent periods of drift and mutation along the branch containing the oogenic bottleneck, namely the early oogenic bottleneck itself, the turnover of mitochondria in the oocyte prior to ovulation, and the period after fertilization but before gastrulation (Fig. 1).

To counteract this conflation, we combined the genetic drift into an effective bottleneck. The posterior distribution of the size of this effective bottleneck (i.e., the EBS) was substantially narrower than that of the explicitly modeled bottleneck, with a median of 17.7 (8.33–30.3, 95% CI) for a mother of the mean age in this dataset (Fig. 4A). This is somewhat smaller than the estimate of the bottleneck size of 32.3 previously estimated from this dataset (REBOLLEDO-JARAMILLO *et al.*, 2014), although the 95% confidence intervals (or credible interval, here) of that previous study and the present one do overlap.

In our model, genetic drift accumulates in the oocyte as the mother ages, and thus the size of the effective bottleneck decreases with age of the mother at childbirth. The inferred relationship between age at childbirth and EBS is shown in Figure 4B. At age 18, the median posterior EBS is 21.7 (11.8–33.4, 95% CI), and at age 40, it is 15.3 (6.4–28.6). The median posterior rate of decrease of the EBS is 0.26 bottleneck units per year, although the central 95% credible interval for this rate of decrease is broad (0.0–0.43). Given the range of this credible interval, there is apparently limited information contained in the data about whether or not the EBS decreases with age, or equivalently, whether genetic drift accumulates meaningfully in the oocyte.

The median posterior rates of genetic drift accumulation in adult somatic tissues were very small, just  $7.2 \times 10^{-5}$  ( $2.0 \times 10^{-6}$ – $3.0 \times 10^{-4}$ , 95% CI) drift units per year for blood, and  $2.0 \times 10^{-4}$  ( $2.0 \times 10^{-6}$ – $4.8 \times 10^{-4}$ ) drift units per year for cheek. On the other hand, the inferred amounts of genetic drift occurring during early development of the somatic tissues was greater: 0.019 (0.011–0.027, 95% CI) drift units for blood, and 0.011 (0.003–0.020) drift units for cheek, roughly equivalent to bottlenecks of size 104.8 (67.1–162.4) and



### genetic drift ( $\log_{10}$ )

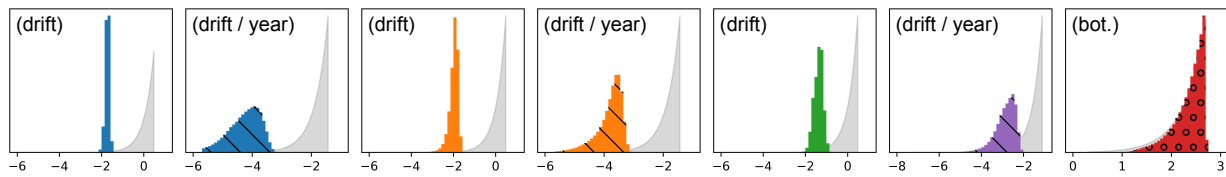

### mutation rate ( $\log_{10} 2N_e\mu$ )

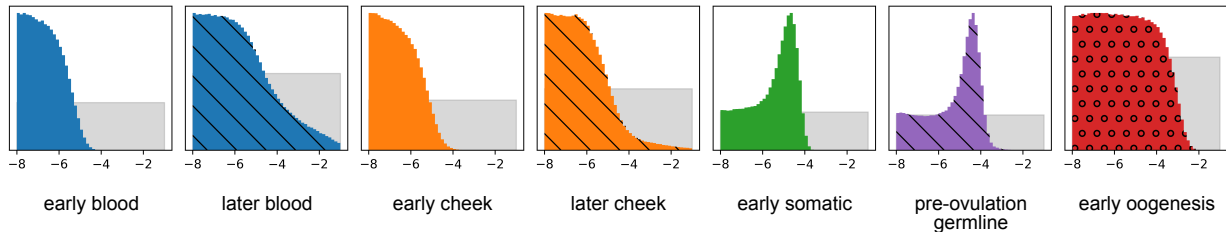

Figure 3: Inference results for real heteroplasmy frequency data. The top row shows results for genetic drift parameters, and the bottom row shows posterior distributions for scaled mutation rates. Distributions hashed with diagonal lines correspond to processes with drift parameterized by rates of accumulation of genetic drift with age. (I.e., they correspond to the dashed lines in Fig. 1.) The circles in the red posterior distributions indicate that this process is modeled by an explicit bottleneck. All parameters are  $\log_{10}$ -transformed, and the depicted distributions correspond to these transformed variables.

177.0 (78.4–504.8), respectively.

The posterior distributions of scaled mutation rates were broad, and thus limited information about the relative population sizes of different developmental and adult tissues is contained in the heteroplasmy frequency data. This is unsurprising given that the problem is similar to attempting to infer population size history from  $\sim 100$  single-nucleotide polymorphisms. A very high scaled mutation rate ( $2N_e\mu > 10^{-3}$ ) is (relatively) most supported in the adult somatic tissues, possibly reflecting the observation that the incidence of heteroplasmy increases with the age of the individual. However, the 95% credible interval of each developmental process spans several orders of magnitude (at least  $10^{-8} < 2N_e\mu < 10^{-5}$ ), so firm conclusions cannot be drawn.

We assessed the fit of our model to the real heteroplasmy data by simulating data under the maximum *a posteriori* (MAP) parameter values and comparing to the real data. Comparing the marginal distribution of allele frequencies in the sampled tissues (i.e., the marginal site-frequency spectrum) from the actual data to the MAP simulation data, we find that the marginal distribution of allele frequencies is similar between the two datasets (Fig. 5A), as is the distribution of absolute differences between each pair of sampled tissues (Fig. 5B).

In order to use Bayes factors (4) to compare the support for different ontogenetic phylogenies, we calculated the posterior evidence integral for the ontogenetic phylogeny in Figure 1 as well as for two additional ontogenetic phylogenies differing in their assumptions about how genetic drift accumulates in somatic tissues (Fig. S3). The first additional model (termed “fixed”, Fig. S3A), assumes that all genetic drift and mutation particular to each somatic tissue occurs early during development and that there is no additional drift accumulating later in life. The second, (“linear”, Fig. S3B), assumes that genetic drift and mutation accumulate linearly with age in somatic tissues. Our original model (Fig. 1) we term “both”, since it assumes that genetic drift both occurs in a fixed quantity during early development and accumulates later in life.

We find that the “fixed” and “both” models are much more supported than than the “linear” model, with the approximate log-evidence values of the “fixed”, “both”, and “linear” models being  $-1691 \pm 4$ ,  $-1694 \pm 5$ , and  $-1787 \pm 4$ , respectively. In the “both” model, in which there is both a period of genetic drift and mutation in the somatic tissues during early development, the inferred rates of drift accumulation are very small ( $7.2 \times 10^{-5}$  drift units per year in blood,  $2.0 \times 10^{-4}$  drift units per year in cheek epithelial cells). This suggests that there is very little additional genetic drift occurring after birth in the two somatic

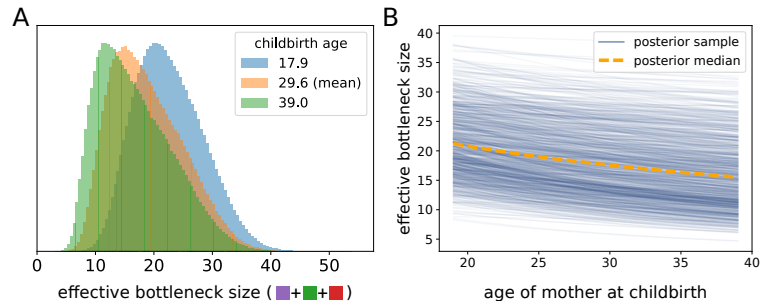

Figure 4: Posterior samples of the effective bottleneck size for mothers of different ages. **(A)** Posterior distribution of the effective between-generation bottleneck size for younger, older, and median-aged mothers. The schematic of the sum represents the calculation of the effective bottleneck size, with the colors matching the processes in Figure 1. **(B)** Relationship between mother's age at childbirth and the effective oogenic bottleneck size. The orange dashed line shows how the median effective bottleneck size varies with age at childbirth, with each having the form of (B.4), where the genetic drift parameters in this equation are jointly sampled from the posterior distribution. A total of  $n = 1000$  lines sampled from the posterior are plotted. We note that each line necessarily decreases with mother birth age due to our assumption that genetic drift accumulates at some rate in the oocyte (see (B.4)); what varies from one line to another is the rate at which the effective bottleneck size decreases due to this accumulation of genetic drift.

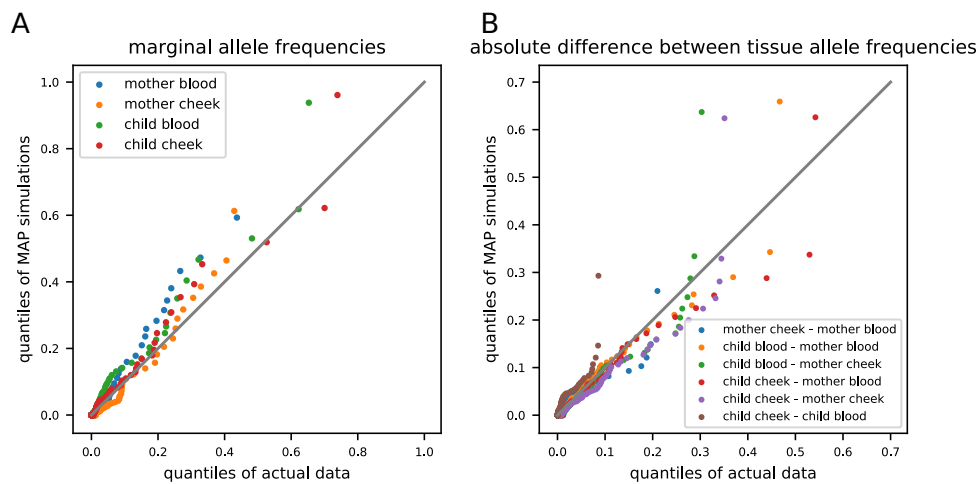

Figure 5: Quantile-quantile comparison of actual heteroplasmy data from REBOLLEDO-JARAMILLO *et al.* (2014) and data simulated under maximum *a posteriori* parameter estimates inferred from this data. Panel **(A)** compares marginal distributions of allele frequencies in each tissue, and panel **(B)** compares distributions of absolute differences in allele frequency between tissues. Each dot represents a sequential percentile of the distributions being compared. Following REBOLLEDO-JARAMILLO *et al.* (2014), heteroplasmy alleles were polarized such that the minor allele in the mother (averaged across her two tissues) was denoted as the focal allele.

tissues considered here.

#### 4. Discussion

Because we modeled genetic drift during multiple ontogenetic processes between embryogenesis in the mother and the sampling of tissues in the child, our estimate of the size of the oogenic bottleneck *per se* was imprecise, with a broad 95% credible interval (34.4–489.2). However, our estimates of the EBS (median 17.7, 95% CI: 8.3–30.3) are similar to other recent estimates of the oogenic bottleneck size, including an estimate of 32.3 in a previous analysis of the data used in this study (REBOLLEDO-JARAMILLO *et al.*, 2014), and a previous estimate of 9 in LI *et al.* (2016).

Our inference framework allows for the size of the effective oogenic bottleneck to decrease with the age of the mother as genetic drift accumulates in the oocyte. We found a broad posterior distribution of the rate by which the EBS decreases in the oocyte (roughly 0.00–0.43 bottleneck units per year, 95% CI), demonstrating that with the 39 mother-child pairs and 98 heteroplasmic loci in the dataset we analyzed (REBOLLEDO-JARAMILLO *et al.*, 2014), there is insufficient information obtained by our model to determine whether genetic drift accumulates with age in the oocyte. In the future, sampling more individuals and tissues, and with larger pedigrees, it may be possible to provide stronger statistical evidence for or against genetic drift occurring in the oocyte; this will potentially be informative on the question of how mitophagy and mitochondrial turnover are involved in oocyte aging, a topic of interest in the study of human fertility (see ZHANG *et al.*, 2017).

In addition to the effective bottleneck between mother and offspring, we also quantified genetic drift occurring during the embryonic development of the blood and cheek epithelial lineages. We found that the embryonic genetic drift of heteroplasmy frequencies specific to these tissues was less than the effective between-generation bottleneck but still appreciable, with median posterior estimates of the effective bottleneck sizes being 104.8 (67.1–162.4, 95% CI) and 177.0 (78.4–504.8) for blood and cheek epithelial, respectively.

At the same time we inferred that there is little accumulation of genetic drift in adult somatic tissues. This may seem to contradict previous observations that heteroplasmies increase in number with age (e.g., REBOLLEDO-JARAMILLO *et al.*, 2014; LI *et al.*, 2016). If the effective population size of the somatic stem cells supporting mitotic somatic tissues is larger than the effective population size during embryogenesis or the maternal germ line, an accumulation of genetic drift with age would produce additional *de novo* somatic heteroplasmies. On the other hand, if effective population sizes of somatic stem cells are smaller than effective population sizes during early development, a longer period of genetic drift in adulthood would result in fewer heteroplasmies, as genetic variation is lost due to ongoing genetic drift in a smaller population. Here, the posterior distributions of population-scaled mutation rates are too broad to permit anything to be concluded about the relative sizes of relevant stem cell populations.

There are several ways our inference procedure could be extended. Our model assumes selective neutrality, but it is possible that neutral population-genetic models do not adequately describe the dynamics of heteroplasmy frequency change. Studies of heteroplasmy occurrence in humans have found a relative lack of non-synonymous heteroplasmies (YE *et al.*, 2014; REBOLLEDO-JARAMILLO *et al.*, 2014), or an excess of non-synonymous mutations at low versus high frequencies (LI *et al.*, 2016), suggesting purifying selection. However, evidence for biased transmission of the major heteroplasmic allele over the minor allele has been inconsistent, with one recent study finding no systematic difference in heteroplasmy allele frequency between other offspring (LI *et al.*, 2016), while the original publication of the data analyzed here did find transmission to be biased towards the major allele at non-synonymous sites (REBOLLEDO-JARAMILLO *et al.*, 2014). Another recent study has also found evidence for positive selection for heteroplasmies in somatic tissues, observing repeated occurrence of tissue-specific and allele-specific heteroplasmies in many unrelated individuals (LI *et al.*, 2015).

If selection tends to act on only a single heteroplasmic variant at a given time (i.e., if clonal interference between different heteroplasmic alleles is rare), the method we present here could potentially be adapted to make inferences about natural selection in place of mutation. We leave this for future work and note in the

meantime that our neutral model of genetic drift and mutation on an ontogenetic tree does seem to fit the data reasonably well (Fig. 5).

We chose to model heteroplasmy allele frequency dynamics with the Wright-Fisher population model from population genetics. This model is well-studied and thus facilitates interpretation, and it is general in the sense that many different population-genetic models of reproduction closely resemble the Wright-Fisher model when population sizes are large (EWENS, 2004). However, it is possible that the dynamics of heteroplasmy frequency change do not meet the basic assumptions of any population-genetic model. Any population-genetic model of heteroplasmy would assume that the germ cells or somatic stem cells giving rise to heteroplasmy would compete with one another for reproduction or at least be chosen randomly for transmission or reproduction. If instead, for example, there exists a cellular mechanism of quality control, such that non-heteroplasmic eggs are given priority in ovulation and tend to be ovulated before heteroplasmic eggs, the number of transmitted heteroplasmy would increase with mother's age, but the dynamics would not be completely described by any population-genetic model that assumes random mating (with or without natural selection) and competition amongst egg cells for offspring. Other such mechanisms of heteroplasmy propagation could be imagined. Even if standard population-genetic models cannot adequately describe heteroplasmy frequency change, modeling heteroplasmy frequency changes on an ontogenetic phylogeny would still be a valid approach.

JOHNSTON *et al.* (2015) have recently used a detailed, mechanistic model of mitochondrial duplication, degradation, and partitioning to study mitochondrial dynamics during oogenesis. The authors applied their model to data on the time evolution of heteroplasmy frequency variance during oogenesis in mice, finding that the size of the oogenic bottleneck is just one contributor to the final variance in heteroplasmy frequencies after oogenesis is complete. This work complements the present study, in that it analyzes just one phase of ontogeny (*viz.*, oogenesis) and makes use of time series observations of heteroplasmy frequencies in mice rather than heteroplasmy frequencies in multiple somatic tissues in adult humans. To use such a mechanistic model of heteroplasmy dynamics for the present study would likely be fruitless, given the limited information contained in the data we analyze about mitochondrial dynamics during any single developmental stage. However, as heteroplasmy samples grow in size, this may be a useful direction for future developments.

We assume that the shape of the ontogenetic phylogeny relating the sampled tissues is known. For the dataset from REBOLLEDO-JARAMILLO *et al.* (2014), this is an appropriate assumption, since the two somatic tissues in the mother must be most closely related to one another, just as the two somatic tissues of the offspring must be most closely related to one another. For other datasets, differing in the number or identity of the sampled tissues, there may be less of an *a priori* expectation for the shape of the ontogenetic phylogeny. While there is a general understanding of the major divisions of tissues during development, the embryonic origins and lineage of somatic germ cell populations are not straightforward and still being established (e.g., ROMAGNANI *et al.*, 2015; FUENTEALBA *et al.*, 2015; BOISSET and ROBIN, 2012). The current model could easily be extended to ontogenetic phylogenies for families with two or more offspring. For families with more than two offspring, the genealogy of the oogonia eventually giving rise to the offspring would be unknown. This part of the phylogeny could be inferred jointly with other parameters, or, depending on the inferred rate of genetic drift in the female germ lineage (here  $1.6 \times 10^{-3}$  drift units per year), it could be assumed that no genetic drift occurs between the birth of the youngest and oldest children.

The topology of the ontogenetic phylogeny could also be made more complicated by admixture, which is not included in our inference framework. Admixture could result from biological processes, such as contributions to a mitotic tissue from distinct, isolated adult stem cell niches, or from physical sampling of an organ containing multiple tissues derived from distinct developmental lineages. Conceptually, our ontogenetic phylogeny approach could be extended to work with admixture graphs (PATTERSON *et al.*, 2012; PICKRELL and PRITCHARD, 2012) by adapting the pruning algorithm for calculating likelihoods to the dependence structure introduced by admixture. However, given the small size of current heteroplasmy frequency datasets compared to large whole-genome SNP datasets, detecting admixture with *f*-statistics (PATTERSON *et al.*, 2012; PETER, 2016) or a more typical population phylogeny inference procedure (e.g., *Treemix*, PICKRELL and PRITCHARD, 2012) would likely be more suitable.

The inference framework we present here should be applicable in future studies of heteroplasmy dynamics in humans and other organisms. Our software *mope* is flexible with respect to the pedigree of the sampled

individuals and thus is suitable for studies of heteroplasmy both across several generations and within unrelated individuals. Flexibility is also given with respect to the number of tissues sampled—even studies of just a single tissue may benefit from modeling multiple ontogenetic processes (e.g., LI *et al.*, 2016). Our fully Bayesian inference method provides a natural way of quantifying uncertainty, which is important in studies of heteroplasmy as the number of polymorphic loci is often small compared to other genomic studies. Finally, *mope* allows the user to choose the ontogenetic processes to place in the ontogenetic phylogeny; in the current version allele frequency changes for each such ontogenetic process occur according to the neutral Wright-Fisher model, but processes governed by other dynamics (e.g., selection, mutation) could be implemented by modifying the freely available source code.

The ontogenetic phylogeny framework may also be useful in areas other than the study of mitochondrial heteroplasmy. In particular, in the study of the dynamics of cancer evolution, heterogeneous progression in samples of many tumors may necessitate modeling per-day rates of genetic drift and mutation (or natural selection) rather than fixed amounts common to all tumors. Our inference procedure could also be used in the typical population phylogenetic setting to infer the divergence history of a group of populations, but this application is limited by the relatively small number of loci ( $< O(1000)$ ) that our method can accept due to the computational costs of likelihood evaluations with the pruning algorithm. A maximum-likelihood implementation of our model, requiring fewer likelihood evaluations, may be applicable to genome-scale SNP data, possibly comparing to *Kim Tree* (GAUTIER and VITALIS, 2013) and *SpikeyTree* (TATARU *et al.*, 2015).

## 5. Acknowledgments

We thank members of the Nielsen and Makova Labs for helpful comments. Computational resources were provided by UC Berkeley High Performance Computing. This work was funded by NIH R01GM116044.

## 6. References

- BOISSET, J.-C., and C. ROBIN, 2012 On the origin of hematopoietic stem cells: Progress and controversy. *Stem Cell Research* **8**: 1–13.
- CAO, L., H. SHITARA, T. HORII, Y. NAGAO, H. IMAI, *et al.*, 2007 The mitochondrial bottleneck occurs without reduction of mtDNA content in female mouse germ cells. *Nature Genetics* **39**: 386–390.
- CARLING, P. J., L. M. CREE, and P. F. CHINNERY, 2011 The implications of mitochondrial DNA copy number regulation during embryogenesis. *Mitochondrion* **11**: 686–692.
- CREE, L. M., D. C. SAMUELS, S. C. DE SOUSA LOPES, H. K. RAJASIMHA, P. WONNAPINIJ, *et al.*, 2008 A reduction of mitochondrial DNA molecules during embryogenesis explains the rapid segregation of genotypes. *Nature Genetics* **40**: 249–254.
- EWENS, W. J., 2004 *Mathematical Population Genetics 1*. Number 27 in *Interdisciplinary Applied Mathematics*. Springer, New York, 2 edition.
- FELSENSTEIN, J., 1981 Evolutionary trees from DNA sequences: a maximum likelihood approach. *Journal of Molecular Evolution* **17**: 368–376.
- FOREMAN-MACKEY, D., D. W. HOGG, D. LANG, and J. GOODMAN, 2013 emcee: The MCMC hammer. *Publications of the Astronomical Society of the Pacific* **125**: 306–312. ArXiv: 1202.3665.
- FUENTEALBA, L., S. ROMPANI, J. PARRAGUEZ, K. OBERNIER, R. ROMERO, *et al.*, 2015 Embryonic origin of postnatal neural stem cells. *Cell* **161**: 1644–1655.
- GAUTIER, M., and R. VITALIS, 2013 Inferring population histories using genome-wide allele frequency data. *Molecular Biology and Evolution* **30**: 654–668.
- GOGGANS, P. M., and Y. CHI, 2004 Using thermodynamic integration to calculate the posterior probability in Bayesian model selection problems. *AIP Conference Proceedings* **707**: 59–66.
- GOODMAN, J., and J. WEARE, 2010 Ensemble samplers with affine invariance. *Communications in Applied Mathematics and Computational Science* **5**: 65–80.
- GUO, Y., C.-I. LI, Q. SHENG, J. F. WINTHER, Q. CAI, *et al.*, 2013 Very low-level heteroplasmy mtDNA variations are inherited in humans. *Journal of genetics and genomics* **40**: 607–615.
- HENDY, M. D., M. D. WOODHAMS, and A. DODD, 2009 Modelling mitochondrial site polymorphisms to infer the number of segregating units and mutation rate. *Biology Letters* : rsbl.2009.0104.
- JOHNSTON, I. G., J. P. BURGSTALLER, V. HAVLICEK, T. KOLBE, T. RULICKE, *et al.*, 2015 Stochastic modelling, Bayesian inference, and new in vivo measurements elucidate the debated mtDNA bottleneck mechanism. *eLife* **4**. ArXiv: 1512.02988.
- KELLEHER, J., A. M. ETHERIDGE, and G. MCVEAN, 2016 Efficient coalescent simulation and genealogical analysis for large sample sizes. *PLOS Comput Biol* **12**: e1004842.

- LI, M., R. ROTHWELL, M. VERMAAT, M. WACHSMUTH, R. SCHRDER, *et al.*, 2016 Transmission of human mtDNA heteroplasmy in the Genome of the Netherlands families: support for a variable-size bottleneck. *Genome Research* **26**: 417–426.
- LI, M., A. SCHÖNBERG, M. SCHAEFER, R. SCHROEDER, I. NASIDZE, *et al.*, 2010 Detecting heteroplasmy from high-throughput sequencing of complete mitochondrial DNA genomes. *The American Journal of Human Genetics* **87**: 237–249.
- LI, M., R. SCHR ODER, S. NI, B. MADEA, and M. STONEKING, 2015 Extensive tissue-related and allele-related mtDNA heteroplasmy suggests positive selection for somatic mutations. *Proceedings of the National Academy of Sciences* **112**: 2491–2496.
- LI, M., and M. STONEKING, 2012 A new approach for detecting low-level mutations in next-generation sequence data. *Genome Biology* **13**: R34.
- MARCHINGTON, D. R., G. M. HARTSHORNE, D. BARLOW, and J. POULTON, 1997 Homopolymeric tract heteroplasmy in mtDNA from tissues and single oocytes: support for a genetic bottleneck. *American Journal of Human Genetics* **60**: 408–416.
- MILLAR, C. D., A. DODD, J. ANDERSON, G. C. GIBB, P. A. RITCHIE, *et al.*, 2008 Mutation and evolutionary rates in Adélie penguins from the Antarctic. *PLoS Genetics* **4**: e1000209.
- PATTERSON, N., P. MOORJANI, Y. LUO, S. MALLICK, N. ROHLAND, *et al.*, 2012 Ancient admixture in human history. *Genetics* **192**: 1065–1093.
- PETER, B. M., 2016 Admixture, population structure, and  $f$ -statistics. *Genetics* **202**: 1485–1501.
- PICKRELL, J. K., and J. K. PRITCHARD, 2012 Inference of population splits and mixtures from genome-wide allele frequency data. *PLoS Genetics* **8**: e1002967.
- REBOLLEDO-JARAMILLO, B., M. S.-W. SU, N. STOLER, J. A. MCELHOE, B. DICKINS, *et al.*, 2014 Maternal age effect and severe germ-line bottleneck in the inheritance of human mitochondrial DNA. *Proceedings of the National Academy of Sciences* **111**: 15474–15479.
- ROMAGNANI, P., Y. RINKEVICH, and B. DEKEL, 2015 The use of lineage tracing to study kidney injury and regeneration. *Nature Reviews Nephrology* **11**: 420–431.
- SONDHEIMER, N., C. E. GLATZ, J. E. TIRONE, M. A. DEARDORFF, A. M. KRIEGER, *et al.*, 2011 Neutral mitochondrial heteroplasmy and the influence of aging. *Human Molecular Genetics* **20**: 1653–1659.
- STEWART, J. B., and P. F. CHINNER, 2015 The dynamics of mitochondrial DNA heteroplasmy: implications for human health and disease. *Nature Reviews Genetics* **16**: 530–542.
- TATARU, P., T. BATAILLON, and A. HOBOLTH, 2015 Inference under a Wright-Fisher model using an accurate beta approximation. *Genetics* **201**: 1133–1141.
- WACHSMUTH, M., A. HUBNER, M. LI, B. MADEA, and M. STONEKING, 2016 Age-related and heteroplasmy-related variation in human mtDNA copy number. *PLoS Genetics* **12**: e1005939.
- WALLACE, D. C., and D. CHALKIA, 2013 Mitochondrial DNA genetics and the heteroplasmy conundrum in evolution and disease. *Cold Spring Harbor Perspectives in Biology* **5**: a021220.
- YE, K., J. LU, F. MA, A. KEINAN, and Z. GU, 2014 Extensive pathogenicity of mitochondrial heteroplasmy in healthy human individuals. *Proceedings of the National Academy of Sciences* **111**: 10654–10659.
- ZHANG, D., D. KEILTY, Z. ZHANG, and R. CHIAN, 2017 Mitochondria in oocyte aging: current understanding. *Facts, Views & Vision in ObGyn* **9**: 29–38.

## Appendix A. Likelihood calculation

Briefly, the pruning algorithm calculates, for each node  $n$  in the phylogeny and each frequency  $f_j$  at node  $n$ , the probability  $P(\mathcal{D}_{(n)} | x_{(n)} = f_j)$ , where  $\mathcal{D}_{(n)}$  is the data at all the leaves collectively having  $n$  as their most recent common ancestor, and  $x_{(n)}$  is the heteroplasmy allele frequency at node  $n$ . The algorithm proceeds up the tree, from the leaves to the root, using the fact that

$$P(\mathcal{D}_{(n)} | x_{(n)} = f_j) = \prod_{\substack{c \\ \text{child of } n}} \sum_k P(x_{(c)} = f_k | x_{(n)} = f_j) P(\mathcal{D}_{(c)} | x_{(c)} = f_k). \quad (\text{A.1})$$

Here and below the current genetic drift parameters  $\mathbf{b}$  and mutation rates  $\boldsymbol{\theta}$  are implied. We model the probability of the data at leaf (i.e., sampled tissue) node  $l$  as the binomial likelihood

$$P(\mathcal{D}_{(l)} | x_{(l)} = f_j) = \binom{C_l}{h_l} f_j^{h_l} (1 - f_j)^{C_l - h_l}, \quad (\text{A.2})$$

where  $C_l$  and  $h_l$  are respectively the total coverage and number of alternative alleles in that tissue.

Given each  $P(\mathcal{D}_{(r)} | x_{(r)} = f_j)$  for root node  $r$ , the overall likelihood is

$$P(\mathcal{D}_{(r)}) = \sum_j P(x_{(r)} = f_j) P(\mathcal{D}_{(r)} | x_{(r)} = f_j). \quad (\text{A.3})$$

The probabilities  $P(x_{(r)} = f_j)$  are given by the heteroplasmy frequency distribution at the root, a discretized symmetric beta distribution with additional weight at frequencies 0 and 1, the parameters of which are inferred jointly with the genetic drift and mutation parameters.

The probability of heteroplasmy (cf. denominator (3)) can be calculated as

$$P(H_i; \mathbf{b}, \boldsymbol{\theta}) = 1 - P(\mathcal{D} \mid \text{all leaves 0}) - P(\mathcal{D} \mid \text{all leaves 1}), \quad (\text{A.4})$$

with the second two terms giving the probability of the read count data in all the sampled tissues given that allele frequencies are all 0 or 1, respectively.

## Appendix B. Calculation of the effective bottleneck size

We define the effective bottleneck between mother and offspring as the combined genetic drift occurring during the early oogenic bottleneck, the turnover of mitochondria in the maternal germline prior to ovulation, and the first few cell divisions after fertilization but before gastrulation. We combined the effects of genetic drift during these processes by 1) translating all drift parameters into units of generations per effective population size ( $g/N_e$ , “drift units”), 2) summing the drift, in these units, and 3) translating this summed drift back into units of an instantaneous bottleneck. Since we assumed that bottlenecks occurred for just a single generation followed by doubling back up to a large population size (here,  $N = 1000$ ), we determined that the relationship between drift  $d_g$  measured in drift units and  $N_b$ , an instantaneous bottleneck size, is close to

$$d_g = \sum_{i=0}^n \frac{1}{N_b 2^i}, \quad (\text{B.1})$$

where  $n = \lfloor \log_2(N/N_b) \rfloor$  is the number of generations it takes for the population size to double back up to the original population size.

For  $N_b \ll N$ , this sum is well approximated by the integral

$$d_g \approx \int_{-\frac{1}{2}}^{\log_2(N/N_b)} \frac{dt}{2^t N_b} = \frac{N\sqrt{2} - N_b}{N N_b \ln 2} \approx \frac{\sqrt{2}}{N_b \ln 2} \approx \frac{2}{N_b}. \quad (\text{B.2})$$

The lower limit of integration follows from an interpretation of (B.1) as a midpoint Riemann sum, improving accuracy. Thus we also have

$$N_b \approx \frac{2}{d_g}. \quad (\text{B.3})$$

For a mother of age  $a$ , the effective bottleneck size is thus

$$N_{be} = \frac{2}{\frac{2}{N_b} + a\lambda_g + d_s}, \quad (\text{B.4})$$

where  $N_b$  is the early oogenesis bottleneck size,  $\lambda_g$  is the rate at which genetic drift accumulates in the maternal germline, and  $d_s$  is the amount of genetic drift occurring after fertilization but before gastrulation.

We confirmed (B.2) and (B.3) by finding, for different bottleneck sizes  $N_b$ , the amount of drift  $d_g$  that minimized the total variation distance between the allele frequency transition distributions specified by  $d_g$  and  $N_b$ :

$$\hat{d}_g(N_b) = \operatorname{argmin}_{d_g} \frac{1}{2} \sum_i |p_{d_g}(i) - q_{N_b}(i)|. \quad (\text{B.5})$$

Here  $p_{d_g}$  is the probability transition distribution for drift parameterized by  $d_g$  drift units, and  $q_{N_b}$  is the probability transition distribution for drift parameterized by bottleneck size  $N_b$ . Minimizing (B.5) for different values of  $N_b$  shows that our approximation (B.2) closely follows the numerical translation minimizing the total variation distance (Fig. S4).

Supplementary Material.

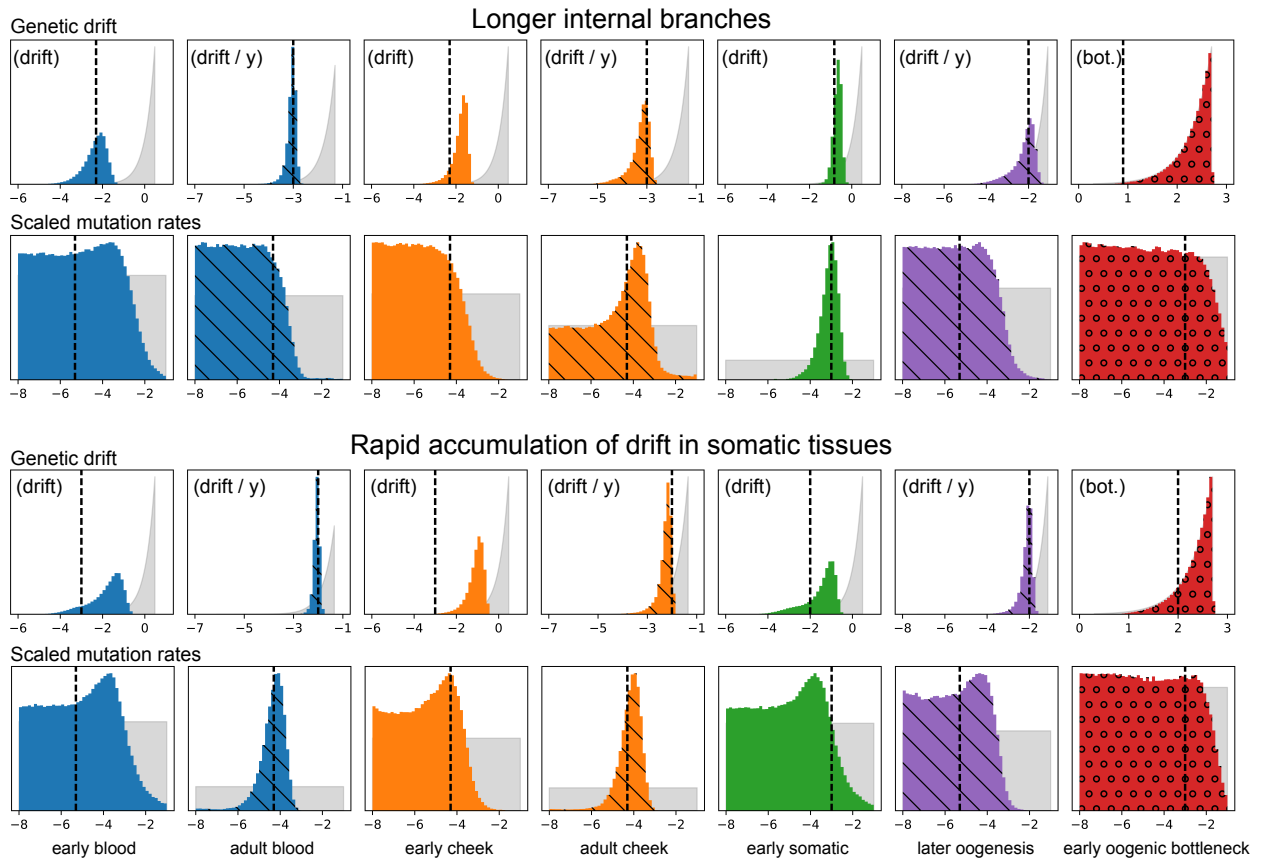

Figure S1: Inference results from additional simulations under the model assumed by our inference procedure. The first two rows show posterior distributions of parameters estimated under simulations in which the internal branches are relatively long compared to the simulations presented in the main text. These parameters were inferred from the frequencies of 103 heteroplasmies amongst 500 independently sites in 40 simulated families. The second pair of rows shows posterior distributions for simulations in which the rates of accumulation of genetic drift in the somatic tissues is increased compared to the simulations in the main text. In these simulations, there were 109 heteroplasmies amongst 400 independently segregating sites simulated in 80 families. Posterior distributions are shown with colored histograms, prior distributions are shown with gray histograms, and true parameter values are shown with dashed vertical lines. Colors match the corresponding developmental processes in Figure 1. Distributions hashed with diagonal lines correspond to processes with drift parameterized by rates of accumulation of genetic drift with age, and circles in the red posterior distributions indicate that this process is modeled by an explicit bottleneck.



### Genetic drift

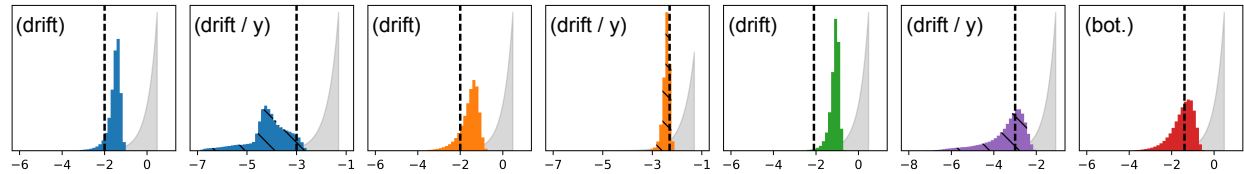

### Scaled mutation rates ( $2N\mu$ )

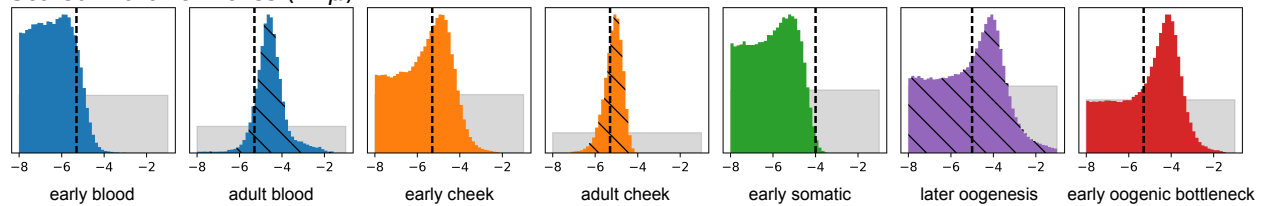

Figure S2: Inference results from simulations with full recombination between heteroplasms segregating within a single family. The first row shows posterior distributions (color histograms), prior distributions (gray distributions) and simulated parameter values (dashed vertical lines) for genetic drift parameters. The second row shows the same for scaled mutation rate parameters. In order to simplify simulations, the period of genetic drift in early oogenesis was modeled as a period of genetic drift in a fixed population size rather than as a single-generation bottleneck.

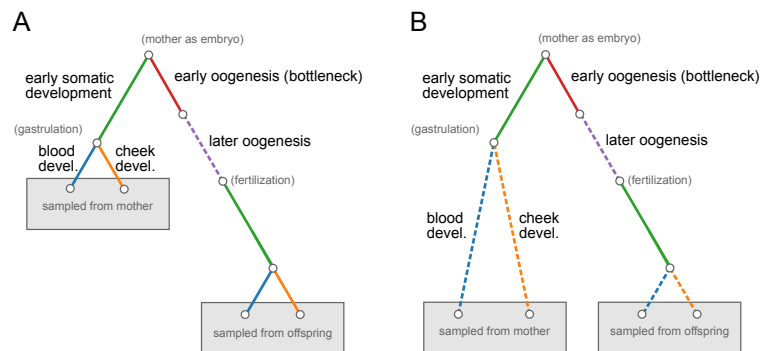

Figure S3: Two additional ontogenetic phylogenies for which we calculated the total Bayesian evidence. The two models differ in how they model genetic drift and mutation in the somatic tissues. The “fixed” model (Panel **A**) assumes that all genetic drift and mutation in the somatic tissues occurs early in development, and the “linear” model (Panel **B**) assumes that genetic drift and mutation in somatic tissues accumulate linearly with the age of the individual. Compare these to the model in Figure 1 (termed “both”), which assumes that genetic drift and mutation in somatic tissues occurs both in a fixed amount during early development and in adulthood, accumulating linearly with age.

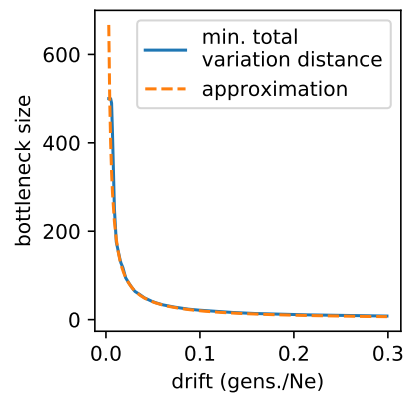

Figure S4: Translation of genetic drift into effective bottleneck sizes. The blue line shows, for different drift durations, the effective bottleneck size minimizing the total variation distance to the allele frequency transition distribution parameterized by generations per effective population size. The dashed orange line shows Equation (B.3), our approximate translation between the two parameterizations.
